# Supplementary material
Source: publisher figshare collection journal article supplement (https://gsajournals.figshare.com/ndownloader/files/22851404)
Supplement: Supplementary file 1 [file 22851404]

**Figure S5. The within population covariance (dots) and the decrease of covariance between populations as between-population distance increases (line) for the first layer for the conStruct analysis for K=1 (A) and K=2 (B).**
